# Supplementary material for: Insertion of Transposable Elements in AVR-Pib of Magnaporthe oryzae Leading to LOSS of the Avirulent Function
Source: MDPI journal article supplement (doi:10.3390/ijms242115542), 2023-10-24
Supplement: s1 [file s1]

## Supplementary materials

**Table S1** Tajima's Neutrality Test of *AVR-Pib* in *M. oryzae*<sup>a</sup>

| <i>m</i> | <i>S</i> | $\pi$   | <i>D</i>                   |
|----------|----------|---------|----------------------------|
| 126      | 6        | 0.00164 | -1.61687 (NS, 0.10>P>0.05) |

<sup>a</sup> The analysis involved 126 nucleotide sequences of *AVR-Pib*. *m* indicates number of sequences, *S* indicates number of segregating sites,  $\pi$  indicates nucleotide diversity, and *D* is the Tajima test statistic. Tajima's *D*: -1.61687, Statistical significance: Not significant, 0.10>P>0.05.

**Table S2** Genotype of *AVR-Pib* in isolates from different hosts

| Species   | Host                                               | Total isolates | Genotype <sup>a</sup> |    |    |    |
|-----------|----------------------------------------------------|----------------|-----------------------|----|----|----|
|           |                                                    |                | L0                    | L1 | L2 | L3 |
| Wild rice | <i>Oryza rufipogon</i>                             | 18             | 4                     | 8  | 5  | 1  |
| Banana    | <i>Musa nana</i> Lour.                             | 6              | 6                     | 0  | 0  | 0  |
| Wheat     | <i>Triticum aestivum</i> Linn <sup>b</sup>         | 2              | 1                     | 1  | 0  | 0  |
| Weed      | <i>Digitaria sanguinalis</i>                       | 1              | 1                     | 0  | 0  | 0  |
|           | <i>Eleusine indica</i>                             | 1              | 0                     | 1  | 0  | 0  |
|           | <i>Eleusine coracana</i>                           | 1              | 0                     | 1  | 0  | 0  |
|           | <i>Lolium perenne</i> Linn <sup>b</sup>            | 2              | 2                     | 0  | 0  | 0  |
|           | <i>Setaria viridis</i> (Linn.) Beauv. <sup>b</sup> | 1              | 1                     | 0  | 0  | 0  |
|           | Total isolates                                     | 32             | 15                    | 11 | 5  | 1  |

<sup>a</sup> L1 and L2 (one fragment of different size), and L3 (two fragments of L1 and L2), L0 (no amplification).

<sup>b</sup>The sequences come from Genbank.

**Table S3** Lists accessions of *Pib* were obtained from GenBank used in this study.

| Species                    | No. | Accession  | Sub-species              | Nucleotide sequences<br>of exon1 of <i>Pib</i> used<br>for phylogeny | Partial nucleotide<br>sequences of<br>exon3 of <i>Pib</i><br>used for<br>phylogeny |   | Note       |
|----------------------------|-----|------------|--------------------------|----------------------------------------------------------------------|------------------------------------------------------------------------------------|---|------------|
|                            |     |            |                          |                                                                      |                                                                                    |   |            |
| <b>Wild rice</b>           | 1   | DQ317976.1 | <i>O. longistaminata</i> | ✓                                                                    |                                                                                    |   |            |
|                            | 2   | DQ317977.1 | <i>O. meyeriana</i>      | ✓                                                                    |                                                                                    |   |            |
|                            | 3   | DQ298751.1 | <i>O. officinalis</i>    | ✓                                                                    |                                                                                    |   |            |
|                            | 4   | DQ317975.1 | <i>O. rufipogon</i>      | ✓                                                                    |                                                                                    |   |            |
|                            | 5   | DQ298750.1 | <i>O. rufipogon</i>      | ✓                                                                    |                                                                                    |   |            |
|                            | 6   | DQ317978.1 | <i>O. rufipogon</i>      | ✓                                                                    |                                                                                    |   |            |
|                            | 7   | EF642440.1 | <i>O. rufipogon</i>      |                                                                      |                                                                                    | ✓ |            |
|                            | 8   | EF642443.1 | <i>O. rufipogon</i>      |                                                                      |                                                                                    | ✓ |            |
|                            | 9   | EF642442.1 | <i>O. rufipogon</i>      |                                                                      |                                                                                    | ✓ | Pseudogene |
|                            | 10  | EF642441.1 | <i>O. rufipogon</i>      |                                                                      |                                                                                    | ✓ | Pseudogene |
|                            | 11  | EF642422.1 | <i>O. nivara</i>         |                                                                      |                                                                                    | ✓ | Pseudogene |
| <b><i>Oryza sativa</i></b> | 12  | KX791056.1 | <i>Indica</i>            | ✓                                                                    |                                                                                    |   |            |
|                            | 13  | AB013449.2 | <i>Japonica</i>          | ✓                                                                    |                                                                                    |   |            |
|                            | 14  | JN564623.1 | <i>Indica</i>            | ✓                                                                    |                                                                                    | ✓ |            |
|                            | 15  | JN564624.1 | <i>Indica</i>            | ✓                                                                    |                                                                                    | ✓ |            |
|                            | 16  | JN564625.1 | <i>Indica</i>            | ✓                                                                    |                                                                                    | ✓ |            |
|                            | 17  | AB013448.1 | <i>Japonica</i>          | ✓                                                                    |                                                                                    | ✓ |            |
|                            | 18  | AB026839.1 | <i>O. sativa</i>         | ✓                                                                    |                                                                                    | ✓ |            |
|                            | 19  | KR527239.1 | <i>O. sativa</i>         | ✓                                                                    |                                                                                    | ✓ |            |
|                            | 20  | KR527238.1 | <i>O. sativa</i>         | ✓                                                                    |                                                                                    | ✓ |            |
|                            | 21  | KR527240.1 | <i>O. sativa</i>         | ✓                                                                    |                                                                                    | ✓ |            |
|                            | 22  | KR527242.1 | <i>O. sativa</i>         | ✓                                                                    |                                                                                    | ✓ |            |
|                            | 23  | KR527241.1 | <i>O. sativa</i>         | ✓                                                                    |                                                                                    | ✓ |            |
|                            | 24  | KR527237.1 | <i>O. sativa</i>         | ✓                                                                    |                                                                                    | ✓ |            |
|                            | 25  | KR527234.1 | <i>O. sativa</i>         | ✓                                                                    |                                                                                    | ✓ |            |
|                            | 26  | KR527235.1 | <i>O. sativa</i>         | ✓                                                                    |                                                                                    | ✓ |            |
|                            | 27  | KR527233.1 | <i>O. sativa</i>         | ✓                                                                    |                                                                                    | ✓ |            |
|                            | 28  | KR527226.1 | <i>O. sativa</i>         | ✓                                                                    |                                                                                    | ✓ |            |
|                            | 29  | KR527227.1 | <i>O. sativa</i>         | ✓                                                                    |                                                                                    | ✓ |            |
|                            | 30  | KR527228.1 | <i>O. sativa</i>         | ✓                                                                    |                                                                                    | ✓ |            |
|                            | 31  | KR527229.1 | <i>O. sativa</i>         | ✓                                                                    |                                                                                    | ✓ |            |
|                            | 32  | KR527225.1 | <i>O. sativa</i>         | ✓                                                                    |                                                                                    | ✓ |            |
|                            | 33  | KR527224.1 | <i>O. sativa</i>         | ✓                                                                    |                                                                                    | ✓ |            |
|                            | 34  | KR527223.1 | <i>O. sativa</i>         | ✓                                                                    |                                                                                    | ✓ |            |
|                            | 35  | KR527222.1 | <i>O. sativa</i>         | ✓                                                                    |                                                                                    | ✓ |            |
|                            | 36  | KR527236.1 | <i>O. sativa</i>         | ✓                                                                    |                                                                                    | ✓ | Pseudogene |
|                            | 37  | KR527231.1 | <i>O. sativa</i>         | ✓                                                                    |                                                                                    | ✓ | Pseudogene |
|                            | 38  | KR527230.1 | <i>O. sativa</i>         | ✓                                                                    |                                                                                    | ✓ | Pseudogene |

|    |            |                  |   |   |            |
|----|------------|------------------|---|---|------------|
| 39 | KR527232.1 | <i>O. sativa</i> | ✓ | ✓ | Pseudogene |
| 40 | EF642438.1 | <i>Indica</i>    |   | ✓ |            |
| 41 | EF642437.1 | <i>Indica</i>    |   | ✓ |            |
| 42 | EF642428.1 | <i>Indica</i>    |   | ✓ |            |
| 43 | EF642424.1 | <i>Indica</i>    |   | ✓ | Pseudogene |
| 44 | EF642423.1 | <i>Indica</i>    |   | ✓ | Pseudogene |
| 45 | EF642435.1 | <i>Japonica</i>  |   | ✓ |            |
| 46 | EF642426.1 | <i>Japonica</i>  |   | ✓ |            |
| 47 | EF642429.1 | <i>Japonica</i>  |   | ✓ |            |
| 48 | EF642427.1 | <i>Japonica</i>  |   | ✓ | Pseudogene |
| 49 | EF642431.1 | <i>Japonica</i>  |   | ✓ | Pseudogene |
| 50 | EF642434.1 | <i>O. sativa</i> |   | ✓ |            |
| 51 | EF642436.1 | <i>O. sativa</i> |   | ✓ |            |
| 52 | KR527245.1 | <i>O. sativa</i> |   | ✓ | Pseudogene |
| 53 | KR527244.1 | <i>O. sativa</i> |   | ✓ | Pseudogene |
| 54 | KR527243.1 | <i>O. sativa</i> |   | ✓ | Pseudogene |
| 55 | KR527246.1 | <i>O. sativa</i> |   | ✓ | Pseudogene |
| 56 | EF642433.1 | <i>O. sativa</i> |   | ✓ | Pseudogene |
| 57 | EF642432.1 | <i>O. sativa</i> |   | ✓ | Pseudogene |

---
